# Supplementary material for: Facile synthesis of anatase TiO2 mesocrystal sheets with dominant {001} facets based on topochemical conversion
Source: Royal Society of Chemistry journal article supplement (doi:10.1039/c0ce00070a), 2010-01-01
Supplement: c0ce00070a.pdf [file c0ce00070a.pdf]

## Supporting Information

# Facile synthesis of anatase TiO<sub>2</sub> mesocrystal sheets with dominant {001} facets based on topochemical conversion

Jianyong Feng,<sup>a,b,c</sup> Mingcai Yin,<sup>a</sup> Zhiqiang Wang,<sup>a</sup> Shicheng Yan,<sup>a</sup> Lijuan Wan,<sup>a</sup>

Zhaosheng Li<sup>\*a,b,c</sup> and Zhigang Zou<sup>a,c</sup>

<sup>a</sup>Ecomaterials and Renewable Energy Research Center, Department of Physics and

<sup>b</sup>Department of Materials Science and Engineering and <sup>c</sup>National Laboratory of Solid

State Microstructures, Nanjing University, Nanjing 210093, P. R. China

\*Corresponding author. E-mail: zsli@nju.edu.cn (Z. S. Li). Postal address: NO. 22,

Hankou Road, Nanjing, Jiangsu 210093, P. R. China. Fax: +86-25-8368-6632.

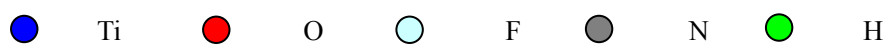

**A**

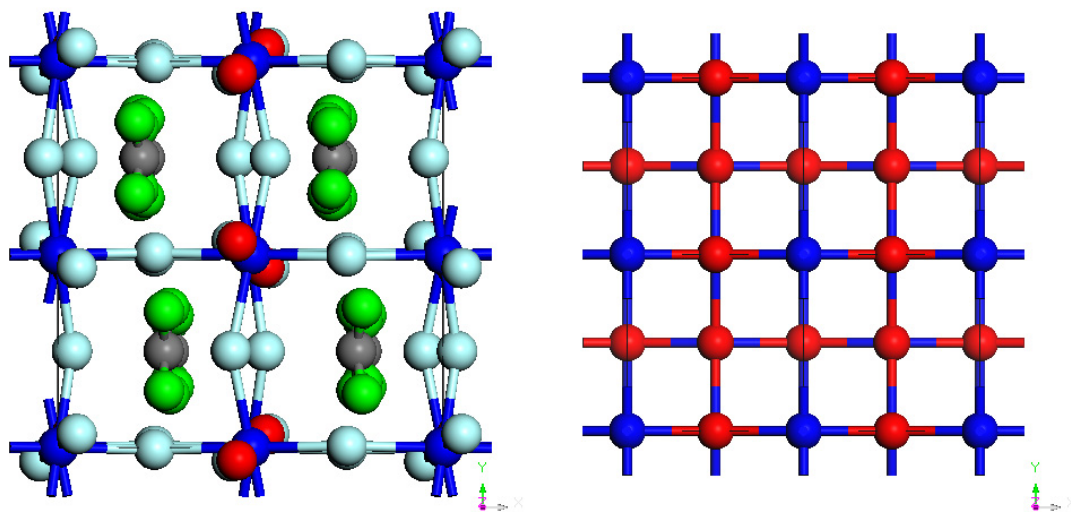

Cell=7.552×7.584×12.754<90×90×90>

Cell=3.785×3.785×9.514<90×90×90>

**B**

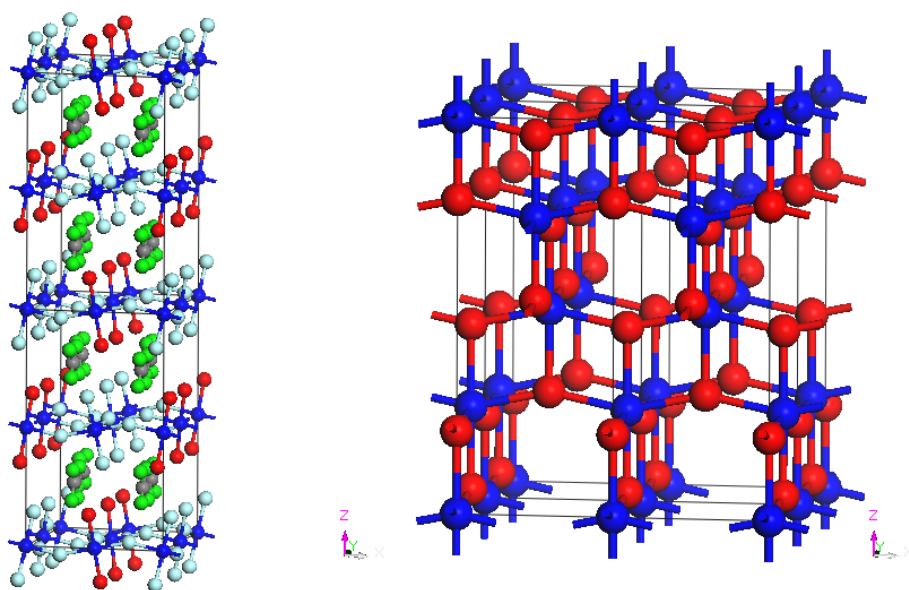

Supercell 7.552×7.584×25.508<90×90×90>

Supercell 7.570×7.570×9.514<90×90×90>

Cell=7.552×7.584×12.754<90×90×90>

Cell=3.785×3.785×9.514<90×90×90>

**Figure S1** Structures of  $\text{NH}_4\text{TiOF}_3$  and anatase  $\text{TiO}_2$  constructed from reference 1. Picture **A** shows the ab plane of both  $\text{NH}_4\text{TiOF}_3$  and anatase  $\text{TiO}_2$ . Picture **B** shows the detailed differences in the Z-axis between  $\text{NH}_4\text{TiOF}_3$  and anatase  $\text{TiO}_2$ .

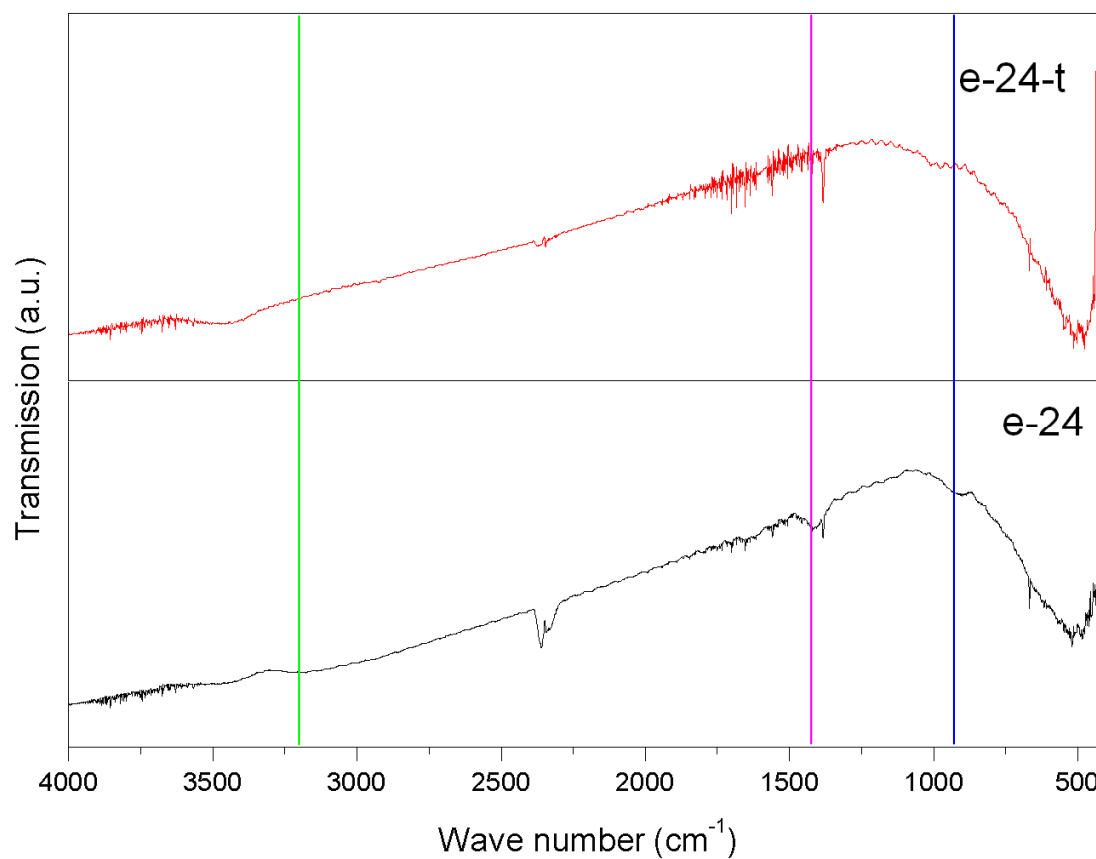

**Figure S2** FT-IR spectra of the sample e-24 and e-24-t

FT-IR spectra shown above provide evidences for the existence of  $\text{NH}_4^+$  and Ti-F bond in sample e-24 and disappearance in sample e-24-t. Peak assignments are taken from reference 2. In detail,  $910\text{ cm}^{-1}$  attributed to the Ti-F vibration mode in e-24 vanishes in e-24-t;  $1410\text{ cm}^{-1}$  corresponding to the bending vibration of  $\text{NH}_4^+$  also decays in e-24-t;  $3428\text{ cm}^{-1}$  assigning to the stretch vibration of N-H disappears in e-24-t.

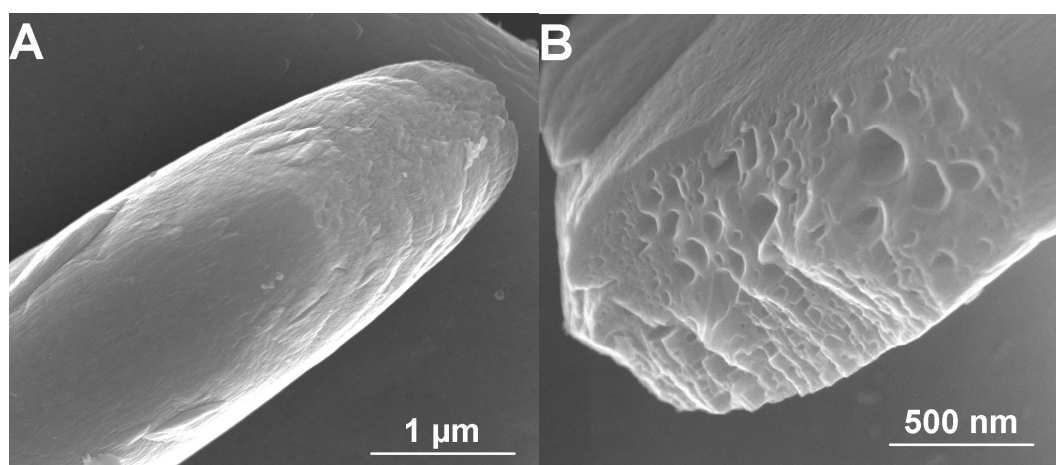

**Figure S3** Images obtained from the cross-section views of a normal sheet and a broken sheet of e-24-t.

## Reference

1. N. M. Laptash, I. G. Maslennikova and T. A. Kaidalova, *J. Fluor. Chem.*, 1999, **99**, 133-137.
2. X. Du, J. H. He and Y. Q. Zhao, *J. Phys. Chem. C*, 2009, **113**, 14151–14158.
